# Supplementary material
Source: PubMed Central journal article supplement (PMC419558)

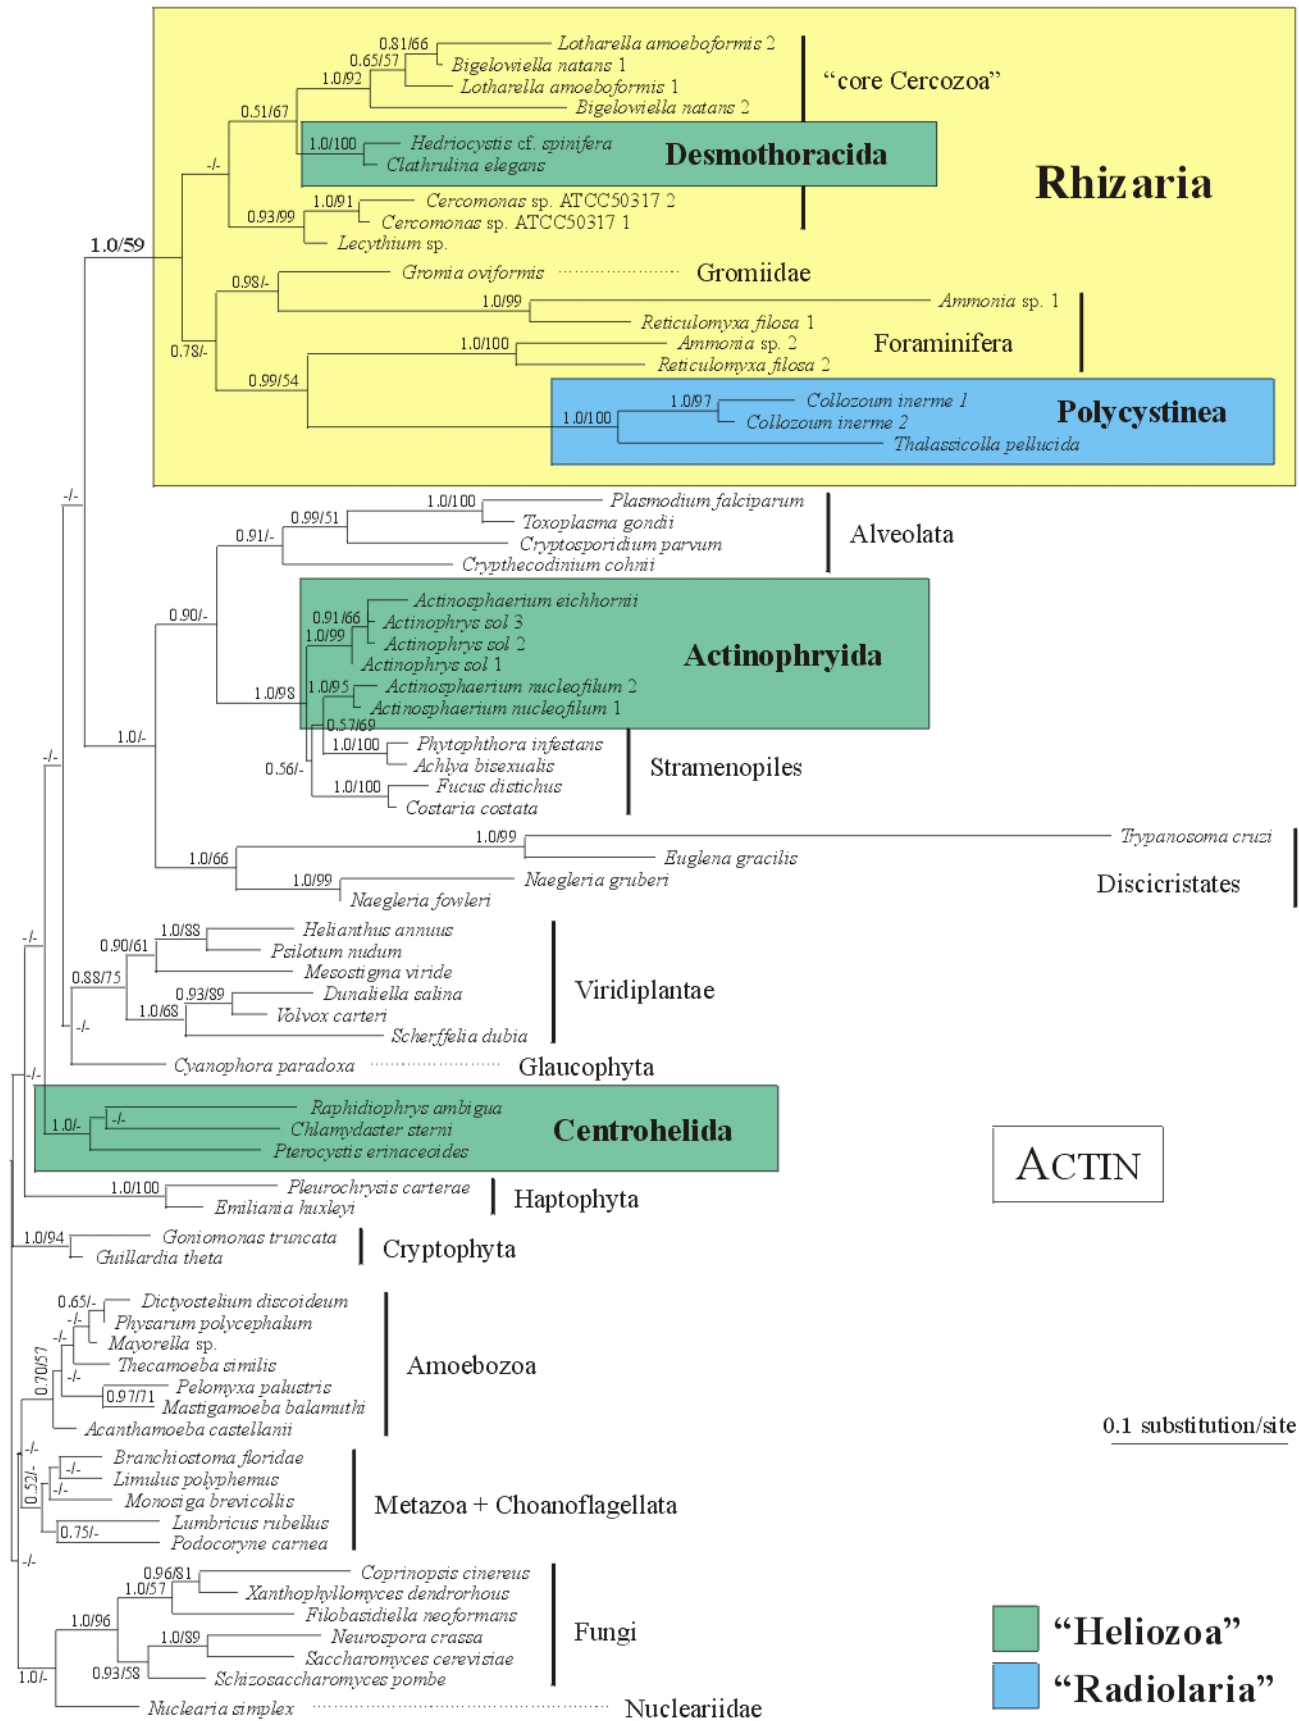

ACTIN

0.1 substitution/site

“Heliozoa”  
“Radiolaria”

Supplement: pnas_101_21_8066__4.pdf [file pnas_101_21_8066__4.pdf]

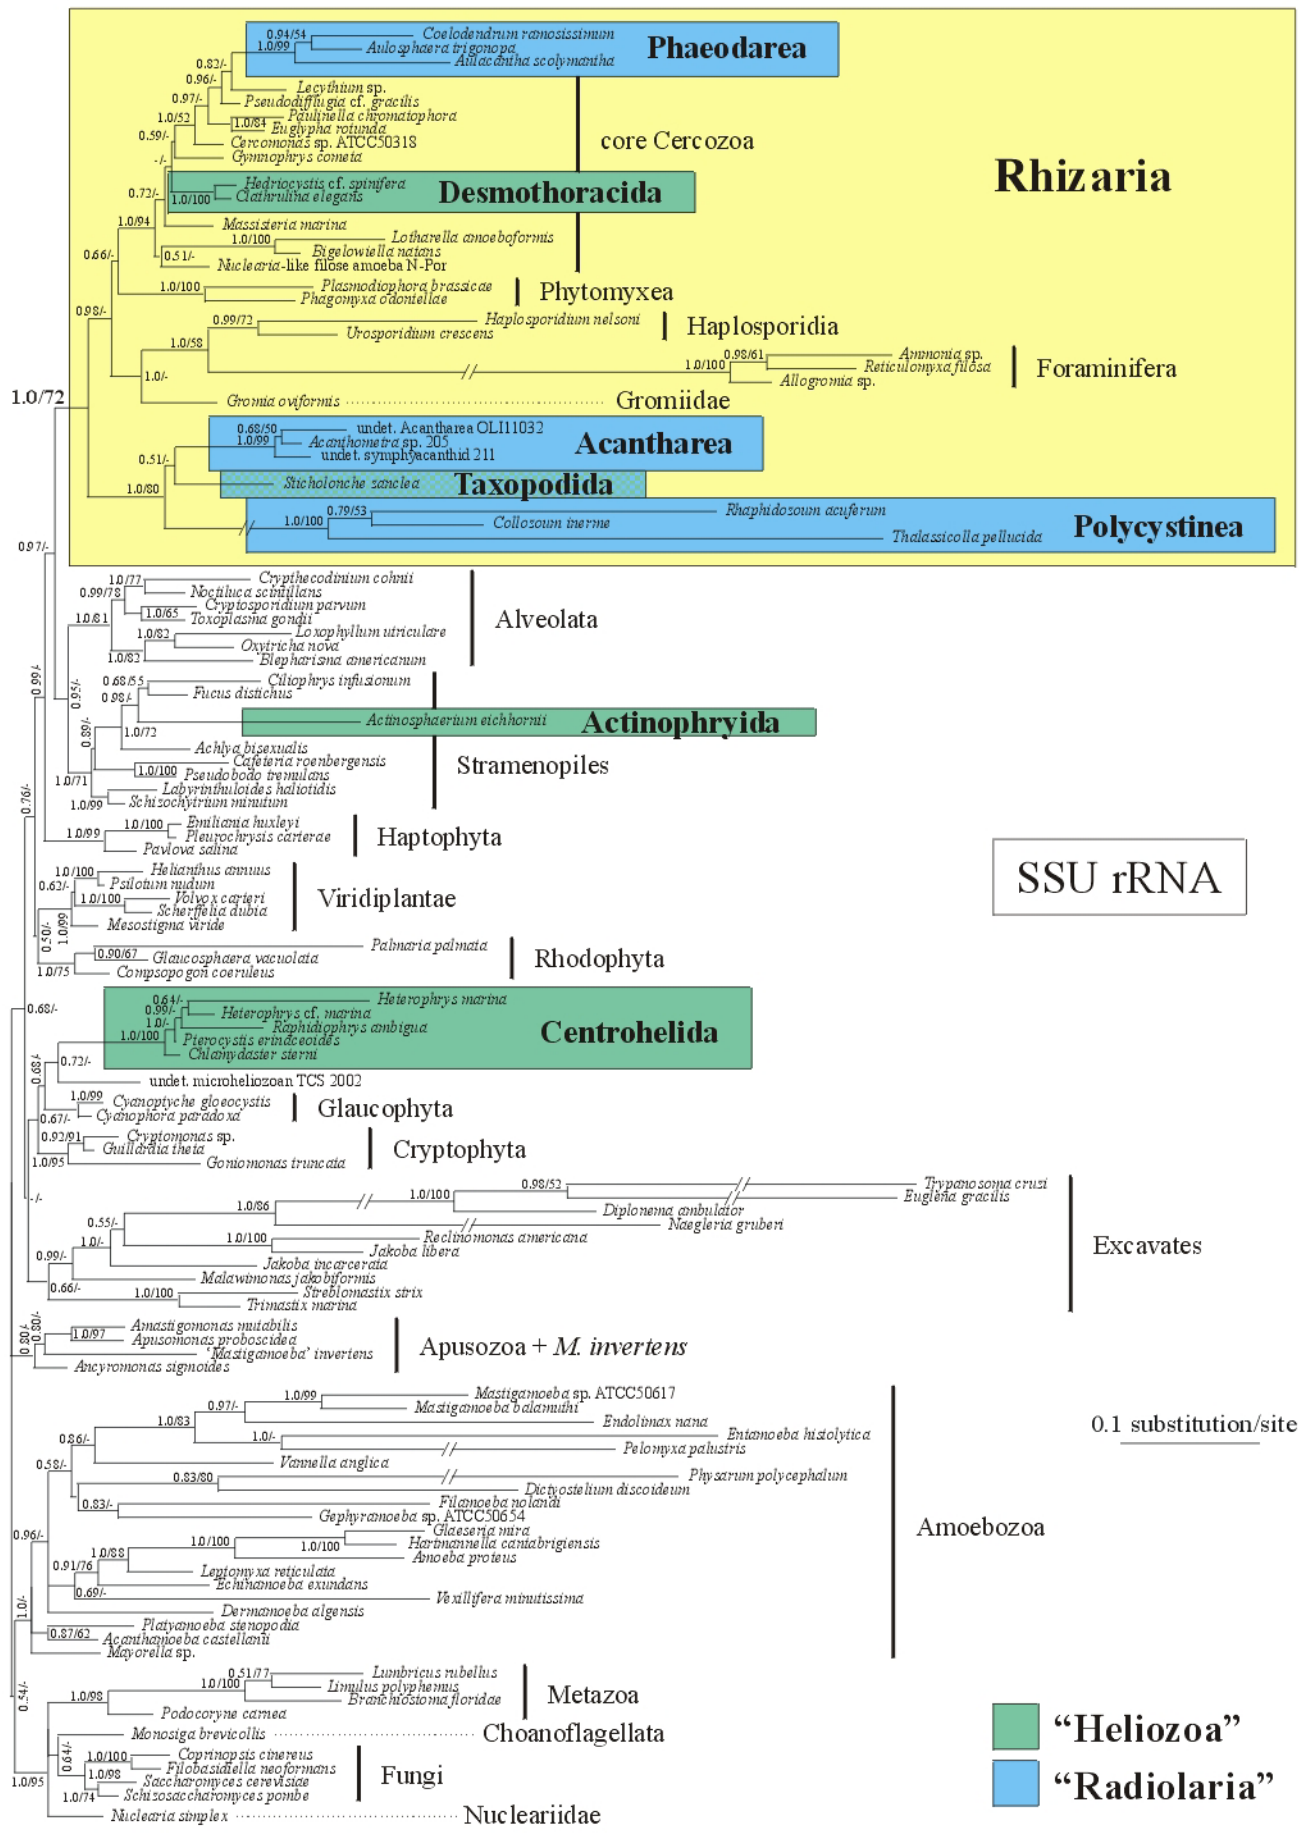

Supplement: pnas_101_21_8066__5.pdf [file pnas_101_21_8066__5.pdf]

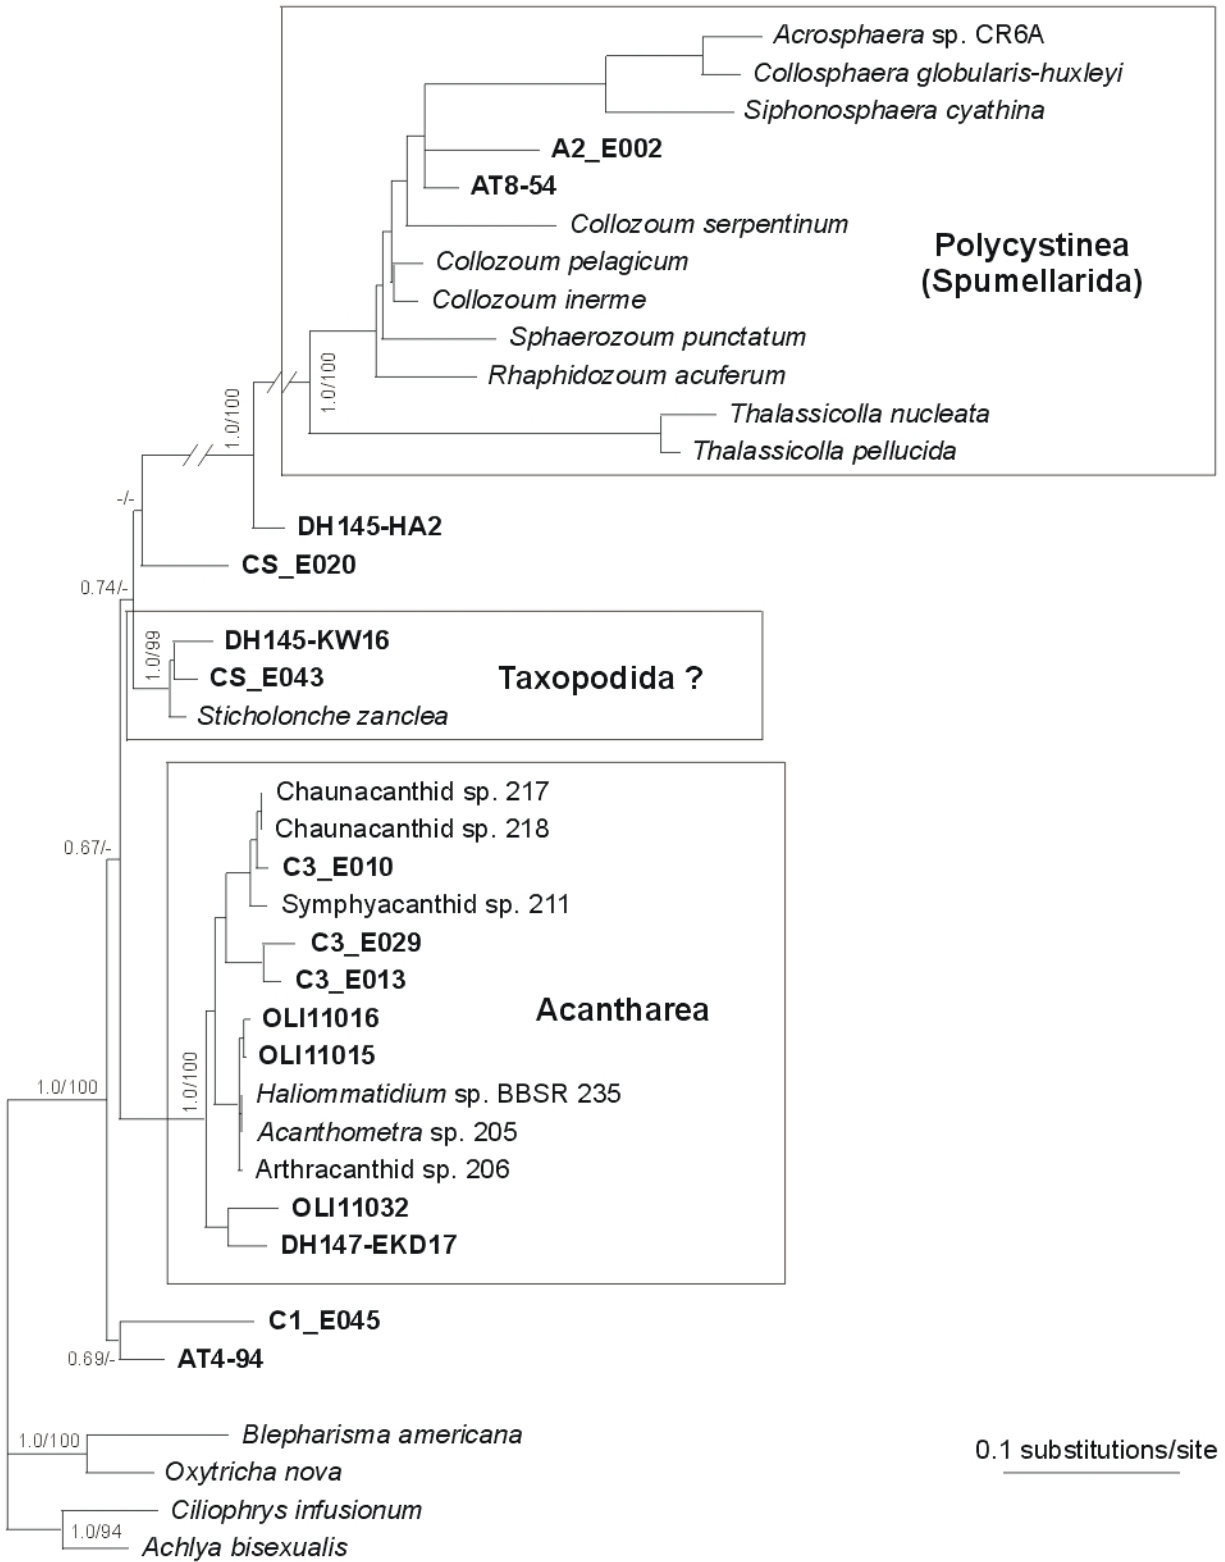

Supplement: pnas_101_21_8066__6.pdf [file pnas_101_21_8066__6.pdf]
